# Supplementary material
Source: PubMed Central journal article supplement (PMC3234962)
Supplement: supp_M111.297630_jbc.M111.297630-3.pdf [file supp_M111.297630_jbc.M111.297630-3.pdf]

| Gene                | Forward                         | Reverse                          |
|---------------------|---------------------------------|----------------------------------|
| Mouse IL2           | 5'-CCCACTTCAAGCTCCACTTC-3'      | 5'-ATCCTGGGGAGTTTCAGGTT-3'       |
| Mouse IL-6          | 5'-AGACACCCGGCACCTCAGGG-3'      | 5'-GGCCCACTGCGATGGGGAAG-3'       |
| Mouse IL-17         | 5'-CTGGGAAGCTCAGTGCCGCC-3'      | 5'-GTGCAGCCCACACCCACCAG-3'       |
| Mouse TNF- $\alpha$ | 5'-CCCTCAAGCTGAGGGGCAGCTCCA-3'  | 5'-GCGCAATGATCCCAAAGTAGACCT-3'   |
| Mouse IFN- $\gamma$ | 5'-ACTGGCAAAGGATGGTGAC-3'       | 5'-TGAGCTCATTGAATGCTTGG-3'       |
| Human IL-2          | 5'-GCAACTCCTGTCTTGCATTG-3'      | 5'-TCCAGCAGTAAATGCTCCAG-3'       |
| Human IFN- $\gamma$ | 5'-GGCTGTTACTGCCAGGACCCA-3'     | 5'-AGCTGCTGGCGACAGTTCAGC-3'      |
| Human IL-6          | 5'-CCTTCAAAGATGGCTGAAA-3'       | 5'-CAGGGGTGGTTATTGCATCT-3'       |
| Human TNF- $\alpha$ | 5'-AGG CGC TCC CCA AGA AGACA-3' | 5'-TCC TTG GCA AAA CTG CAC CT-3' |
