# Supplementary material
Source: PubMed Central journal article supplement (PMC3234962)
Supplement: supp_M111.297630_jbc.M111.297630-4.pdf [file supp_M111.297630_jbc.M111.297630-4.pdf]

| Promoter Gene       | Forward                             | Reverse                              |
|---------------------|-------------------------------------|--------------------------------------|
| Human IL-6          | 5'-TGCACTTTTCCCCCTAGTTG-3'          | 5'-GCCTCAGACATCTCCAGTCC -3'          |
| Human TNF-1         | 5'-GGCTCAAAGGGAGCAAGAGCTGTG-3'      | 5'-TTCACTCCCTGGGGCCCTCTA-3'          |
| Human TNF-2         | 5'-ATATGGCCACACACTGGGGC-3'          | 5'-GGGCTTGGTGGCAGGCTTGA-3'           |
| Human TNF-3         | 5'-TCGGAGCAGGGAGGATGGGG-3'          | 5'-GAGCGTCTGCTGGCTGGGTG-3'           |
| Mouse IL-6          | 5'-AATCAGCCCCACCCACTCTGGC-3'        | 5'-TGCCTCACACTCCTCTCTCA-3'           |
| Mouse TNF- $\alpha$ | 5'-ACTCACTTGGGAGCAGGGACCC-3'        | 5'-TTGAGGAGGGAAAGCCCCCTGT -3'        |
| Mouse IL-2          | 5'-CTGCCACCTAAGTGTGGGCTAACCCGACC-3' | 5'-GCATGCTGTACATGCCTGCAGGACTTGAGG-3' |
| Mouse IFN- $\gamma$ | 5'-GGCTTCTCCTCCTGCGGCCT-3'          | 5'-CCCACCCCGAATCAGCAGCG-3'           |
