# Supplementary material
Source: PubMed Central journal article supplement (PMC3234962)

**A**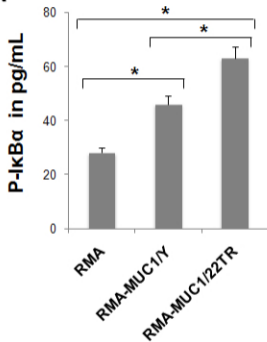**B**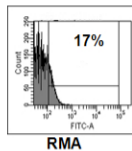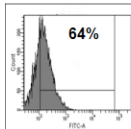**RMA-MUC1/22TR**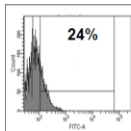**RMA-MUC1/Y****C**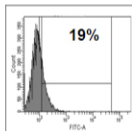**DM6**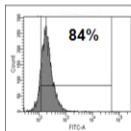**DM6-MUC1/22TR**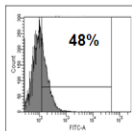**DM6-MUC1/Y**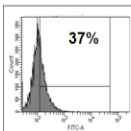**DM6-MUC1/Z**

Supplement: supp_M111.297630_jbc.M111.297630-1.pdf [file supp_M111.297630_jbc.M111.297630-1.pdf]

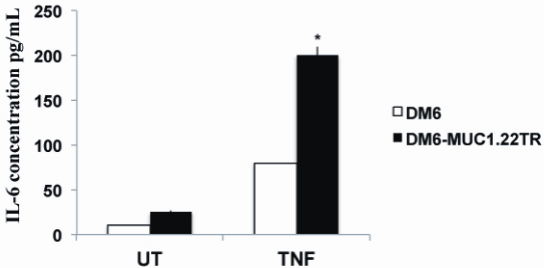

Supplement: supp_M111.297630_jbc.M111.297630-2.pdf [file supp_M111.297630_jbc.M111.297630-2.pdf]
